# Supplementary material for: Understanding the Intrinsic Carrier Transport in Highly Oriented Poly(3-hexylthiophene): Effect of Side Chain Regioregularity
Source: Polymers (Basel). 2018 Jul 25;10(8):815. doi: 10.3390/polym10080815 (PMC6403984; doi:10.3390/polym10080815)
Supplement: Supplementary file 1 [file polymers-10-00815-s001.pdf]

# Understanding the Intrinsic Carrier Transport in Highly Oriented Poly(3-hexylthiophene): Effect of Side Chain Regioregularity

Sanyin Qu, Chen Ming, Qin Yao, Wanheng Lu, Kaiyang Zeng, Wei Shi, Xun Shi, Ctirad Uher and Lidong Chen

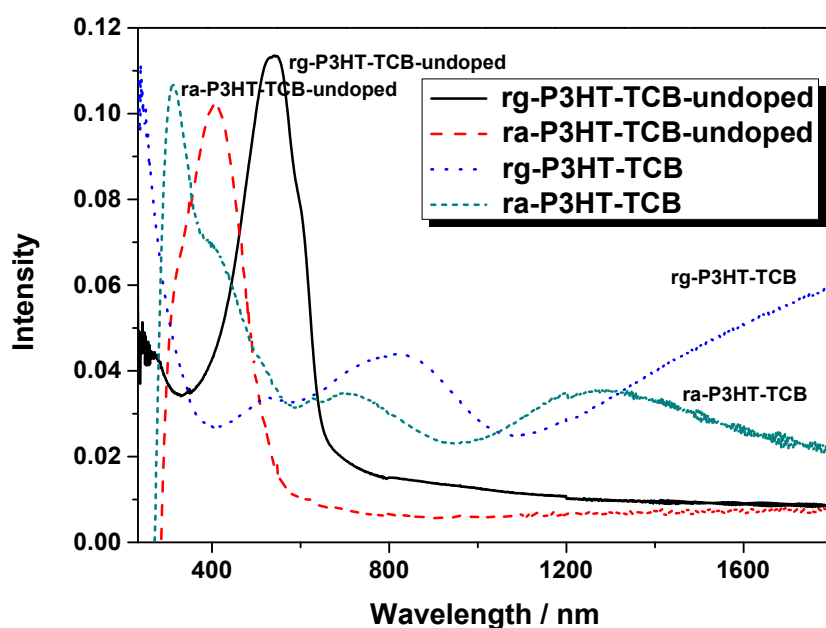

**Figure S1.** UV-Vis-NIR absorption spectrum of ra-P3HT and rg-P3HT before and after doping by Fe(TFSI)<sub>3</sub>.

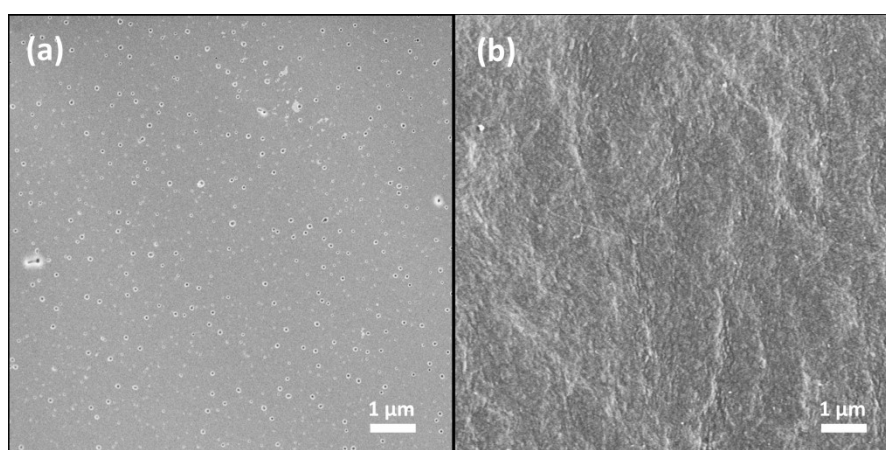

**Figure S2.** SEM images of (a) ra-P3HT and (b) rg-P3HT films. Both samples show homogeneous and compact structure.

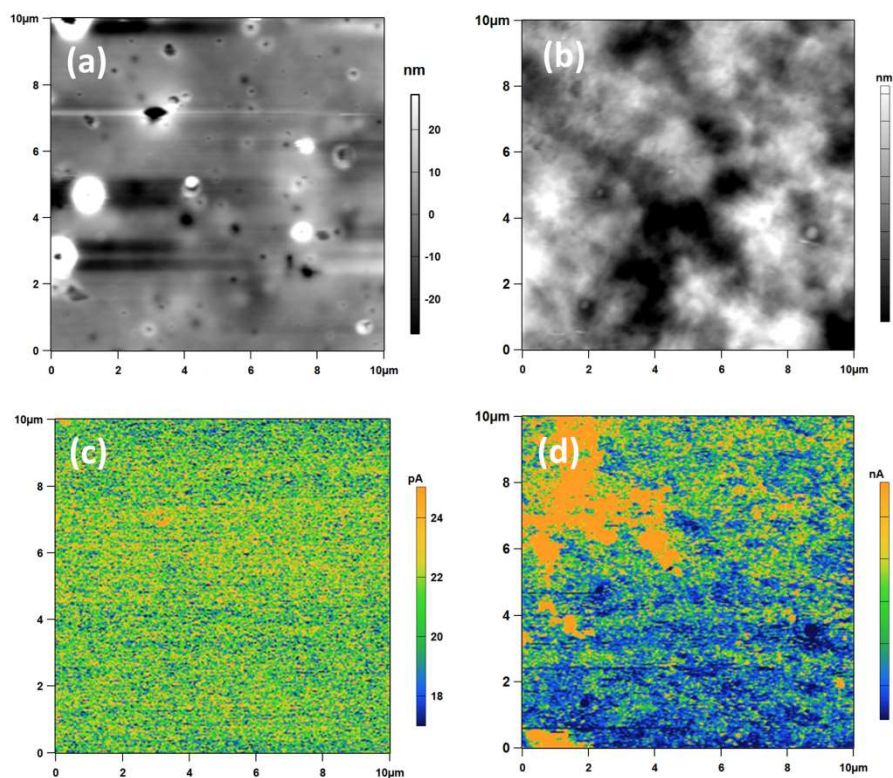

**Figure S3.** C-AFM mapping images. (a) Surface topography of ra-P3HT; (b) Surface topography of rg-P3HT; (c) Current image of ra-P3HT; and (d) Current image of rg-P3HT. The scanning voltages are 0.1 V.

**Table S1.** Thermoelectric properties of self-assembly ra-P3HT and rg-P3HT.

| Sample  | Electrical Conductivity (S/cm) | Seebeck Coefficient ( $\mu\text{V/K}$ ) | Power Factor ( $\mu\text{W/mK}^2$ ) | Carrier Concentration ( $\times 10^{20}\text{cm}^{-3}$ ) | Carrier Mobility ( $\text{cm}^2/\text{V}\cdot\text{s}$ ) |
|---------|--------------------------------|-----------------------------------------|-------------------------------------|----------------------------------------------------------|----------------------------------------------------------|
| ra-P3HT | $1 \pm 0.2$                    | $50 \pm 5$                              | $0.25 \pm 0.02$                     | -                                                        | -                                                        |
| rg-P3HT | $95 \pm 5$                     | $40 \pm 5$                              | $15.2 \pm 1.1$                      | $(4.4 \pm 0.6)$                                          | $1.3 \pm 0.2$                                            |

**Table S2.** Number Average Molecular Weight ( $M_n$ ), Weight Average Molecular Weight ( $M_w$ ) and Polydispersity Coefficient ( $P_i$ ) of ra-P3HT and rg-P3HT.

| Material | $M_n$ (g/mol) | $M_w$ (g/mol) | $P_i$ |
|----------|---------------|---------------|-------|
| ra-P3HT  | 4.26 E4       | 8.74 E4       | 2.05  |
| rg-P3HT  | 4.38 E4       | 8.67 E4       | 1.98  |
